1 **CaProDH2-mediated modulation of proline metabolism confers tolerance to**  
2 **Ascochyta in chickpea under drought**

3 Mahesh Patil<sup>#</sup>, Prachi Pandey<sup>#</sup>, Vadivelmurugan Irrulappan<sup>#</sup>, Anuradha Singh, Praveen  
4 Verma, Ashish Ranjan, Muthappa Senthil-Kumar<sup>1\*</sup>

5 <sup>1</sup>National Institute of Plant Genome Research, Aruna Asaf Ali Marg, New Delhi, India

6  
7 \*Correspondence:

8 Muthappa Senthil-Kumar

9 National Institute of Plant Genome Research

10 Aruna Asaf Ali Marg

11 P.O. Box No. 10531

12 New Delhi - 110 067, India

13 email: [skmuthappa@nipgr.ac.in](mailto:skmuthappa@nipgr.ac.in)

14 <sup>#</sup>Contributed equally

15 Running head: Drought stress negates blight fungus of chickpea

16

17

18 **Abstract**

19 Drought and leaf blight caused by the fungus *Ascochyta rabiei* often co-occur in  
20 chickpea (*Cicer arietinum*)-producing areas. While the responses of chickpea to either  
21 drought or *A. rabiei* infection have been extensively studied, their combined effect on  
22 plant defense mechanisms is unknown. Fine modulation of stress-induced signaling  
23 pathways under combined stress is an important stress adaptation mechanism that  
24 warrants a better understanding. Here we show that drought facilitates resistance  
25 against *A. rabiei* infection in chickpea. The analysis of proline levels and gene  
26 expression profiling of its biosynthetic pathway under combined drought and *A. rabiei*  
27 infection revealed the gene encoding proline dehydrogenase (*CaProDH2*) as a strong  
28 candidate conferring resistance to *A. rabiei* infection. Transcript levels of *CaProDH2*,  
29 pyrroline-5-carboxylate (P5C) quantification, and measurement of mitochondrial reactive  
30 oxygen species (ROS) production showed that fine modulation of the proline–P5C cycle  
31 determines the observed resistance. In addition, *CaProDH2*-silenced plants lost basal  
32 resistance to *A. rabiei* infection induced by drought, while overexpression of the gene  
33 conferred higher resistance to the fungus. We suggest that the drought-induced  
34 accumulation of proline in the cytosol helps maintain cell turgor and raises mitochondrial  
35 P5C contents by a *CaProDH2*-mediated step, which results in ROS production that  
36 boosts plant defense responses and confers resistance to *A. rabiei* infection. Our  
37 findings indicate that manipulating the proline–P5C pathway may be a possible strategy  
38 for improving stress tolerance in plants suffering from combined drought and *A. rabiei*  
39 infection.

40

41 **Keywords:** combined stress, *Ascochyta* blight, drought, proline, P5C modulation,  
42 mitochondria, chickpea

43

44

45

## 46 Introduction

47 Drought exerts complex effects on plant diseases. The effects of drought on pathogen  
48 infection may be positive or negative. The factors governing the net outcome of  
49 combined stresses are the intensity of each imposed stress, the order in which they are  
50 imposed, and the pathogen type (Ramegowda and Senthil-Kumar, 2015; Pandey et al.,  
51 2017). Drought co-occurring with fungal infections affects both growth and productivity  
52 in chickpea (*Cicer arietinum*). While low soil moisture content increases the severity of  
53 black root rot (Bhatti and Kraft, 1992; Sharma and Pande, 2013; Sinha et al., 2019), it  
54 reduces collar rot incidence by inhibiting fungal colonization inside plants (Tarafdar et  
55 al., 2018). Drought stress also modulates the interaction between foliar pathogens and  
56 plants. For example, a survey of *Ascochyta* blight in 251 chickpea fields (including  
57 experimental and farmer fields) in Ethiopia indicated a low disease incidence during the  
58 dry year 2015–2016 (Tadesse et al., 2017).

59 *Ascochyta* blight, caused by *Ascochyta rabiei*, may cause complete harvest loss under  
60 cold and humid weather conditions (Pande et al., 2005; Jaiswal et al., 2012; Sharma  
61 and Ghosh, 2016). *A. rabiei* is a necrotrophic fungus that prefers humid conditions and  
62 low temperatures (20°C). The primary infection source is airborne or water-borne  
63 conidia and ascospores (Ilarslan and Dolar, 2002; Nizam et al., 2010; Sharma and  
64 Ghosh, 2016). After penetration, fungal hyphae accumulate in cortical cells and  
65 differentiate into asexual spores called pycnidia (Pandey et al., 1987) that are  
66 responsible for secondary infection. High moisture enhances secondary infections and  
67 increases the number of spores that persists in the soil. Some areas affected by  
68 *Ascochyta* blight in different parts of the world are also prone to drought stress  
69 (Tadesse et al., 2017; Sinha et al., 2019), providing the rationale to study the effect of  
70 drought on fungal infection.

71 In the field, the combination of drought stress and fungal infection results in a complex  
72 interaction of defense pathways from both the host and the fungus, resulting in the  
73 suppression or the intensification of the infection. Drought-mediated tolerance to fungal  
74 infection may have two distinct causes. First, drought might suppress fungal growth and

75 reproduction, thus reducing the fungal inoculum (Markel et al., 2008). Second, the  
76 defense responses elicited by drought may act as an added arsenal to protect plants  
77 from invading pathogens (Fabro et al., 2004; Chen and Dickman, 2005; Achuo et al.,  
78 2006; Ramegowda et al., 2013; Ayoubi and Soleimani, 2014). Plant responses to  
79 combined stress are themselves a combination of shared and unique molecular and  
80 physiological responses (Pandey et al., 2015). The activation of reactive oxygen  
81 species (ROS) detoxification pathways, the downregulation of the photosynthetic  
82 machinery, the upregulation of stress-responsive genes, and increased accumulation of  
83 osmoprotectants are some of the molecular responses common to drought and biotic  
84 stress imposed by pathogen infections (Achuo et al., 2006; Ramegowda et al., 2013;  
85 Ayoubi and Soleimani, 2014). Several reports have shown that proline metabolism is  
86 commonly regulated by combined drought and pathogen stresses in rice (*Oryza sativa*),  
87 chickpea, and Arabidopsis (*Arabidopsis thaliana*) (Bidzinski et al., 2016; Sinha et al.,  
88 2017; Gupta et al., 2020).

89 Proline is synthesized from glutamate via  $\Delta$ 1-pyrroline-5-carboxylate synthetase (P5CS)  
90 in the cytosol and  $\Delta$ 1-pyrroline-5-carboxylate reductase (P5CR) in chloroplasts. After its  
91 biosynthesis, proline is transported to mitochondria by proline transporters (PTs) and  
92 oxidized by proline dehydrogenase (ProDH) and  $\Delta$ 1-pyrroline-5-carboxylate  
93 dehydrogenase (P5CDH) to form glutamate, with pyrroline-5-carboxylate (P5C) as an  
94 intermediate (proline–P5C cycle; Miller et al., 2009). *ProDH* expression and ProDH  
95 activity are also induced by pathogen infection. For instance, infection with  
96 *Pseudomonas syringae* pv. tomato DC3000 *AvrRpt2* in Arabidopsis raised *ProDH1* and  
97 *ProDH2* transcript levels, leading to an oxidative burst and hypersensitive response  
98 (Cecchini et al., 2011; Monteoliva et al., 2014). Similarly, ProDH2 was upregulated by  
99 combined drought and bacterial wilt in chickpea (Sinha et al., 2017). A regulated proline  
100 metabolism is critical under combined drought and pathogen infection, as proline  
101 contributes to osmoregulation and regulates redox homeostasis under stress conditions  
102 (Kishor et al., 2005). Thus, the role of enzymes of the proline–P5C cycle, particularly  
103 ProDH, should be investigated in more detail under combined drought and fungal  
104 infection in plants.

105 In this study, we examined the effects of drought stress on *A. rabiei* infection in  
106 chickpea under field and greenhouse conditions. We determined the changes in proline  
107 levels and the expression of the genes involved in its biosynthetic pathway under  
108 individual and combined stresses. Our results suggest a possible role for CaProDH2 in  
109 drought-mediated resistance against *A. rabiei* infection, which we validated by miRNA-  
110 induced gene silencing (MIGS) and overexpression studies. We also characterized the  
111 effects of combined drought and pathogen stresses on *CaProDH2*-silenced and  
112 overexpression lines to reveal the role of *CaProDH2* during combined stress conditions.

113

114

## 115 **Results**

### 116 **Effect of drought on *A. rabiei* infection in chickpea plants**

117 To determine the impact of drought stress on *A. rabiei* infection in chickpea, we first  
118 studied the interaction between the two stresses in a field setting in Meerut, India.  
119 Drought and combined-stress plots had ~50% lower soil moisture content than did  
120 control plots and plots with pathogen-infected plants (Supplemental Figure S1A). The  
121 leaves and pods of 3-month-old plants exhibited an 18% decrease in disease incidence  
122 under combined-stress treatment compared to the pathogen-only treatment  
123 (Supplemental Figure S1B). We observed a similar trend at another field location in  
124 Kanpur, India (Supplemental Figure S2G–L). When grown on potato dextrose agar  
125 (PDA) medium, infected pods showed the concentric rings characteristic of *A. rabiei*  
126 growth (Supplemental Figure S2A–E). We isolated fungal pathogens from infected  
127 leaves and confirmed their identity by PCR amplification from genomic DNA and  
128 sequencing (Supplemental Figure S2F). We submitted this isolate to the Indian Type  
129 Culture Collection, India, under ITCC No. 8839.

130 As a second step toward expanding our understanding of the drought–*A. rabiei*  
131 interaction, we exposed chickpea plants to individual and combined stresses under  
132 controlled conditions in a growth chamber, as described in Supplemental Figure S3A.  
133 Well-watered and drought-stressed plants maintained at 80% and 30% field capacity  
134 (FC) showed relative leaf water contents of ~85% and ~68%, respectively  
135 (Supplemental Figure S3B). When analyzed for the incidence of *Ascochyta* blight 16  
136 days post–combined-stress treatment (DPT), plants under combined stress showed  
137 reduced blight symptoms when compared to plants only infected with the pathogen  
138 (Figure 1A). We also observed more severe blight symptoms (23.5% with a score of 5)  
139 in plants exposed to the pathogen in comparison to plants subjected to combined  
140 stresses (13.9% with a score of 5) (Figure 1B; Supplemental Figure S4). Plants  
141 exposed to combined stresses also exhibited decreased cell death (Figure 1C) and  
142 reduced fungal pathogen load (Figure 1D; Supplemental Figure S5) relative to plants  
143 only infected with the pathogen. At 21 DPT, plants infected with *A. rabiei* or exposed to  
144 combined stresses showed a 50% mortality rate; upon re-watering, plants exposed to

145 drought, combined and pathogen stresses exhibited recovery rates of 100%, 80%, and  
146 10%, respectively (Supplemental Figure S6). To independently confirm that any  
147 condition causing water deficit has similar inhibitory effects on *A. rabiei* infection in  
148 chickpea, we exposed seedlings growing on Murashige and Skoog (MS) medium to  
149 polyethylene glycol (PEG)-induced drought and *A. rabiei* infection individually or in  
150 combination. Again, we observed that plants exposed to combined stresses displayed  
151 reduced fungal infection, increased proline accumulation, and less electrolyte damage,  
152 as compared to plants only infected with the pathogen (Supplemental Figure S7).

153

#### 154 **Effect of combined drought and *A. rabiei* infection on proline metabolism**

155 Proline is an osmolyte involved in cell turgor maintenance; it accumulated in drought-  
156 stressed plants 7 d post-*A. rabiei* infection (Figure 2A). We also observed a  
157 concomitant increase in the levels of P5C in plants exposed to drought and combined  
158 stresses compared to controls and plants only infected with the pathogen (Figure 2A).  
159 We identified *CaProDH2* among 402 genes commonly regulated by drought and *A.*  
160 *rabiei* infection in a meta-analysis study of two transcriptome datasets of individual  
161 stresses (Supplemental Figures S8–S10; Supplemental File S1), prompting us to check  
162 the expression of *CaProDH2* and other proline biosynthetic genes in plants exposed to  
163 combined stresses. Drought-only and combined-stress treatments led to higher  
164 expression of genes involved in proline biosynthesis (*CaP5CS1*, *CaP5CS2* and  
165 *CaP5CR*), transport to mitochondria (*CaPT1*), and proline oxidation (*CaProDH2*) both at  
166 early (72 h) and late (12 DPT) stages of infection. By contrast, their expression levels  
167 decreased in plants only infected with the pathogen (Figure 2B). Further,  
168 *CaP5CDH12A1*, involved in reducing P5C to glutamate, was significantly upregulated  
169 under pathogen infection compared to combined-stress treatment (Figure 2B). These  
170 results were further confirmed by analyzing the RNAseq data available for individual  
171 and combined stresses.

172

#### 173 **Development and molecular characterization of *CaProDH2*-silenced plants**

174 To confirm the role of *CaProDH2* in plant defense responses to combined drought and  
175 *A. rabiei* infection, we adopted the MIGS approach to knock down *CaProDH2* transcript  
176 levels (de Felippes et al., 2012) (Supplemental Figure S11). Since MIGS has not been  
177 applied in chickpea, we first tested the method by silencing a phenotypic marker gene,  
178 *PHYTOENE DESATURASE* (*CaPDS*). Accordingly, we cloned a *CaPDS* gene fragment  
179 into the MIGS2.2 vector (which also harbors an expression cassette that drives the  
180 expression of miR173 under the control of the Arabidopsis *UBIQUITIN11* promoter) and  
181 introduced it into the chickpea variety ‘Pusa 362’ (Supplemental Figures S12–S13).  
182 *CaPDS*-silenced plants showed typical photobleaching symptoms, confirming the  
183 silencing of the *CaPDS* gene and the efficacy of MIGS in chickpea (Supplemental  
184 Figures S14–S15). Results of transcriptome deep sequencing (RNA-seq) analysis of  
185 *CaPDS*-silenced plants supported the lower expression of *CaPDS* and other carotenoid  
186 biosynthesis genes without affecting genes involved in primary metabolism when  
187 miR173 is expressed (Supplemental Figure S16; Supplemental File S2).

188

189 Since MIGS appeared effective in chickpea, we generated *CaProDH2*-silenced plants  
190 using a similar strategy (Supplemental Figures S12–S13). We validated putative  
191 transgenic plants by PCR amplification of genomic DNA using *nptII*-specific primers  
192 (Figure 3). We also tested transgenic plants for antibiotic sensitivity by swabbing a  
193 kanamycin solution (150 mg/mL) on the surface of younger leaves of transformed and  
194 wild-type plants for 2 consecutive days. Only non-transgenic, wild-type plants developed  
195 bleached areas where the leaves had been exposed to the antibiotic, whereas no  
196 transgenic plant showed any bleaching (Supplemental Figure S17A). Transgenic plants  
197 that did not show signs of necrosis were selected for further analysis. These plants were  
198 healthy, with a seed-setting rate comparable to that of wild-type plants (Supplemental  
199 Figure S17D). T<sub>2</sub> generation transgenics were used for assessing the stress response  
200 both at physiological and molecular level. *CaProDH2* transcript levels were analyzed in  
201 multiple lines by RT-qPCR and lines MIGS\_*CaProDH2*-8, MIGS\_*CaProDH2*-9, and  
202 MIGS\_*CaProDH2*-12 showed significant down-regulation of gene expression than other  
203 lines (Supplemental Figure S17B). The MIGS\_*CaProDH2*-8 line was selected and used  
204 for further analysis. We confirmed the integration of the transgene in *CaProDH2*-



205 silenced plants by Southern blot hybridization using a *nptII*-specific probe  
206 (Supplemental Figure S17C). *CaProDH2*-silenced plants expressed miR173, as  
207 evidenced by stem–loop reverse transcription–quantitative polymerase chain reaction  
208 (RT-qPCR) (Figure 3B). We detected expression of the predicted trans-acting short  
209 interfering RNAs (tasiRNAs) produced in *CaProDH2*-silenced plants via miR173-  
210 mediated silencing by stem–loop RT-qPCR using tasiRNA7- and tasiRNA12-specific  
211 primers (Figure 3C; Supplemental Figure S18). Based on *in silico* prediction of tasiRNA  
212 targets through the psRNAtarget server, *CaProDH2* was the main target of these  
213 siRNAs (Supplemental File S1). Finally, we documented miR173-mediated cleavage of  
214 *CaProDH2* by 5' RNA Ligase-Mediated Rapid Amplification of cDNA Ends (5' RLM-  
215 RACE), followed by sequencing of the amplified product (Figure 3D). The transgenic  
216 lines also accumulated much lower levels of endogenous *CaProDH2* transcript (Figure  
217 3E).

218

#### 219 ***A. rabiei* infection is aggravated in *CaProDH2*-silenced plants**

220 To probe the role of *CaProDH2* in combined drought and *A. rabiei* infection, we  
221 subjected *CaProDH2*-silenced T<sub>1</sub> lines to combined-stress treatment. Disease  
222 symptoms were more severe in *CaProDH2*-silenced lines than in wild-type plants under  
223 the same conditions (Figure 4A; Supplemental Figure S19A). However, both  
224 *CaProDH2*-silenced and wild-type plants were more susceptible to *A. rabiei* when only  
225 infected with the pathogen (Figure 4A). Indeed, 43% of infected leaves from *CaProDH2*-  
226 silenced lines exhibited severe blight symptoms (score 5) when well-watered, but this  
227 number decreased to 33% in combined-stress conditions. Similarly in wild-type plants,  
228 21% or 6% of leaves showed blight symptoms when infected with the pathogen only or  
229 under combined-stress conditions, respectively (Figure 4B). *CaProDH2*-silenced plants  
230 also exhibited a more pronounced pathogen growth relative to wild-type plants during  
231 both simple infection and combined-stress conditions, as indicated by increased fungal  
232 DNA content (Figure 4C, Supplementary Figure S19B). Wild-type plants exposed to  
233 combined stress experienced the least accumulation of fungal DNA, which further  
234 supports the finding that drought suppresses *Ascochyta* infection in chickpea.

235

236 To better understand how pathogen infection and its progression are affected by  
237 drought, we carried out a detailed microscopic analysis of the infection process in wild-  
238 type and *CaProDH2*-silenced plants. We observed all three different pathogenesis  
239 stages (spore germination, germ tube elongation, and pycnidia formation; Supplemental  
240 Figures S20–S21) and counted the number of pathogenic events in both wild-type and  
241 transgenic when only infected with the pathogen or when subjected to combined  
242 stresses. Drought reduced spore germination, penetration, and pycnidia formation in  
243 both wild-type and *CaProDH2*-silenced plants (Figure 4D). The magnitude of this  
244 reduction was larger in wild-type plants exposed to combined stresses (Figure 4D).  
245 These results demonstrate a possible protective role for ProDH2 in providing defense  
246 against *A. rabiei* infection. As an additional confirmation of the role of ProDH2 in  
247 combined stress tolerance, we generated transgenic chickpea lines by transiently  
248 overexpressing *CaProDH2* and exposed them to combined drought (PEG8000, -0.9  
249 MPa) and *A. rabiei* infection. We observed a marked increase in resistance against  
250 pathogen infection, as evidenced by reduced pathogen load in these transgenic plants  
251 (Supplemental Figure S22).

252

### 253 **Combined stress–induced modulation of the proline–P5C pathway in chickpea**

254 To decipher the role of the proline–P5C cycle in defense against *A. rabiei*, we quantified  
255 the levels of proline and its oxidized form P5C in *CaProDH2*-silenced lines under control  
256 conditions, individual stress and combined stresses. *CaProDH2*-silenced lines failed to  
257 accumulate P5C, and their proline levels were 30% less than those of wild-type plants  
258 (Figure 5A, B). *CaProDH2*-silenced plants also showed a marked downregulation of  
259 proline biosynthetic genes and reduced ROS accumulation under combined stresses  
260 relative to wild-type plants (Figure 5B, 5C, Supplemental Figure S23). Furthermore,  
261 *CaProDH2*-overexpressing lines showed lesser fungal load when compared to  
262 *CaProDH2*-silenced and wild-type plants under combined stresses (Supplemental  
263 Figure S22).

264

265

## 266 Discussion

267  
268 Our field experiments showed that drought stress decreased the severity of Ascochyta  
269 blight in chickpea. A similar drought-mediated reduction in Ascochyta blight incidence  
270 was observed in chickpea fields in Ethiopia during the drought year 2015–2016  
271 (Tadesse et al., 2016). Pot experiments carried out in growth chambers supported  
272 observations made with field-grown plants. We established here that drought stress  
273 reduces the severity of disease symptoms and the accumulation of fungal DNA in *A.*  
274 *rabiei*-infected plants grown under controlled conditions. Moreover, stress-induced  
275 damage, as determined by the extent of cell death reported by Trypan blue staining,  
276 was lowest in plants experiencing combined stresses (Figure 1). Consistent with our  
277 results, low soil moisture inhibited infection by the soil-borne fungus *Sclerotium rolfsii*,  
278 which is responsible for collar rot in chickpea (Tarafdar et al., 2018). In addition, plants  
279 exposed to combined stresses showed a better recovery from drought than plants  
280 exposed to *A. rabiei* alone. Drought stress limited fungal infection and enhanced overall  
281 plant defenses, resulting in better recovery.

282  
283 To investigate the mechanism behind drought-induced tolerance to *A. rabiei*, we  
284 concentrated on proline metabolism under combined drought and *A. rabiei* infection. We  
285 observed a unique modulation of proline levels and expression of its metabolism-related  
286 genes in plants exposed to combined stresses. Proline regulation is crucial in defining  
287 plant responses to both drought stress and pathogen infections (Qamar et al., 2015;  
288 Liang et al., 2013). In agreement with other reports, drought stress caused increased  
289 proline accumulation in infected chickpea plants 7 days post-inoculation. However,  
290 proline accumulation was more limited in plants subjected to combined stresses when  
291 compared to drought-stressed plants (Figure 2A). We also noticed higher expression  
292 levels of the proline catabolism gene *CaProDH2* at early and late time points following  
293 inoculation. *ProDH2* expression was also induced by *Pseudomonas syringae* pv. tomato  
294 in *Arabidopsis* (Cecchini et al., 2011). Furthermore, the increased levels of P5C  
295 measured in plants under combined stresses suggest that these plants metabolize  
296 proline into P5C during the entire combined stress period (Figure 2B).

297

298 We used MIGS to dissect the molecular mechanism behind drought-mediated  
299 Ascochyta blight resistance in chickpea. MIGS has been implemented in many plant  
300 species (Benstein et al., 2013; de Felippes et al., 2012; Zhou et al., 2013; Sicard et al.,  
301 2015; Zheng et al., 2018) to reduce transcript levels of various candidate genes. Here,  
302 we demonstrated the successful establishment of MIGS-mediated silencing for the first  
303 time in chickpea. As miR173 is not present in chickpea, we used the MIGS2.2 vector for  
304 its co-expression along with the tasiRNA-generating cassette, which adds the miR173  
305 target sequence to the gene to be silenced. Transgenic plants expressing miR173 and  
306 wild-type plants were phenotypically indistinguishable. Moreover, RNA-seq analysis of  
307 wild-type plants and miR173-expressing plants revealed no marked differences  
308 between their transcriptomes, indicating that MIGS can be an effective gene silencing  
309 method in chickpea (Supplemental File S2). We then applied MIGS to generate  
310 *CaProDH2*-silenced chickpea plants, which were more susceptible to *A. rabiei* infection  
311 under both well-watered and drought-stress conditions, indicating that the loss of  
312 *CaProDH2* function compromises chickpea defense responses against the pathogen  
313 (Figure 4). Rizzi et al. (2017) reported that *Arabidopsis prodh* mutants exhibited  
314 enhanced susceptibility to the necrotrophic fungus *Botrytis cinerea*. *CaProDH2*-silenced  
315 lines also showed a dysregulation of proline metabolism (Figure 5). Higher ProDH  
316 activity is associated with mitochondrial superoxide production (Cecchini et al., 2011;  
317 Qamar et al., 2015). We therefore checked the levels of mitochondrial ROS in wild-type  
318 and *CaProDH2*-silenced plants. ProDH2 downregulation compromised ROS  
319 accumulation under combined stresses (Figure 5C). Likewise, the silencing of *ProDH*  
320 led to reduced ROS accumulation and compromised disease resistance in *Arabidopsis*  
321 (Cecchini et al., 2011; Senthil Kumar and Mysore, 2012). We showed here that the  
322 elevated P5C content in the leaves of plants experiencing combined stresses increases  
323 mitochondrial ROS production, which triggers an enhanced defense response and  
324 prevents *A. rabiei* proliferation inside chickpea. We have also validated this data with  
325 mitochondrial specific quantification of the P5C. Studies have previously reported on the  
326 role of ROS in plants defense against *Ascochyta* sp. For example, Henares et al. (2019)  
327 showed that the initial phase of *A. lentis* infection in lentils (*Lens culinaris*) results in the

328 release of ROS. Similarly, Rea et al. (2002) showed that inhibition of H<sub>2</sub>O<sub>2</sub> accumulation  
329 increases disease severity in lentils.

330

331 We carefully documented the various stages of fungal infection under well-watered and  
332 drought-stress conditions. Like with the *A. lentis*–lentil pathosystem, infection of *A.*  
333 *rabiei* in chickpea plants can be categorized into three stages: the early phase (0–4  
334 DPI), comprising fungal adhesion, spore germination, and penetration into host cells;  
335 the mid phase (5–9 DPI), characterized by the appearance of the first symptoms due to  
336 fungal colonization of host cells; and the late stage (10 DPI onwards), showing  
337 extensive necrosis and the appearance of pycnidia on leaf tissues, indicating the onset  
338 of the following infection cycle (Pandey et al., 1987; Henares et al., 2019). We observed  
339 reduced spore germination, penetration, and pycnidia formation under combined  
340 stresses compared to plants only infected with the pathogen (Figure 4D). The *in planta*  
341 fungus transcript expression data from co-transcriptome of the chickpea infecting  
342 fungus also supported this observation. Our results agree with a previous report  
343 wherein *prodh2* mutants displayed enhanced mycelial expansion of *B. cinerea* in  
344 Arabidopsis, suggesting a role for ProDH2 in suppressing early infection events like  
345 fungal germination, penetration, and/or hyphal development (Rizzi et al., 2017). Our  
346 results showed that drought stress results in P5C accumulation and ROS induction in  
347 chickpea, which reduces fungal penetration and pycnidia formation. The reduced  
348 pycnidia formation seen in combined infected and drought-stressed plants might yield a  
349 smaller inoculum for the next infection cycle, thereby reducing the extent of leaf-to-leaf  
350 spread of the fungus (Supplemental Figure S24). Our infection experiments in  
351 transgenic plants indicated that both wild-type and *CaProDH2*-silenced plants were  
352 significantly infected by *A. rabiei*, with a comparable extent of spore germination and  
353 penetration (Figure 4). Although pycnidia formation was reduced in *CaProDH2*-silenced  
354 lines, these plants nevertheless exhibited enhanced fungal infection, as determined 13  
355 DPI after the evaluation of the pycnidia formation stage. Reduced pycnidia formation  
356 displayed a prolonged latent phase on plants with compromised *CaProDH2* function. In  
357 turn, an extended dormant period might show the extended ability of a pathogen to  
358 metabolize plant resources before forming reproductive structures (Stotz et al., 2014).

359 Thus, a prolonged latent phase is indicative of compromised defense responses in  
360 *CaProDH2*-silenced lines. Unlike well-watered conditions, the extent of *A. rabiei*  
361 infection was reduced under drought stress in both wild-type and *CaProDH2*-silenced  
362 plants. *CaProDH2*-silenced lines exhibited increased spore germination, penetration,  
363 and pycnidia formation compared to wild-type plants under drought stress. Loss of  
364 ProDH2 function in Arabidopsis plants accelerated the expansion of fungal mycelia,  
365 resulting in enhanced infection by *B. cinerea*, indicating a possible role for the gene in  
366 regulating the early stages of fungal infection (spore germination, penetration, and  
367 hyphal development) (Rizzi et al., 2017). Hence, reduced *CaProDH2* activity, which  
368 brings a reduction in mitochondrial P5C content and ROS-mediated defense, is likely to  
369 be responsible for the higher *A. rabiei* infection in *CaProDH2*-silenced lines.

370

371 We propose that the accumulation of proline in plants exposed to both stresses induces  
372 the expression of *CaProDH2* and thus increases production of P5C. The concomitant  
373 downregulation of *P5CDH* reduces the oxidation of P5C into glutamate, consequently  
374 resulting in increased P5C levels in mitochondria. Thus, we hypothesize that after *A.*  
375 *rabiei* infection, the pool of proline accumulated in drought-stressed plants is oxidized to  
376 P5C in mitochondria via increased *CaProDH2* levels. This conversion step and increase  
377 in mitochondrial P5C lead to ROS production, thereby enhancing defense against  
378 pathogens. The role of ProDH2 and P5C in enhancing chickpea tolerance against  
379 combined stresses is further corroborated by the observation that *CaProDH2*-silenced  
380 lines exhibit higher levels of fungal germination, maturation, and pycnidia formation than  
381 wild-type plants under combined-stress conditions (Figure 4D). Thus, we show that the  
382 accumulation of proline and the fine-tuned regulation of the proline–P5C cycle under  
383 combined stresses leads to enhanced chickpea resistance against *A. rabiei* infection  
384 under drought stress (Figure 6).

385

386 In conclusion, we report drought-induced resistance to the necrotrophic fungus *A. rabiei*  
387 in chickpea, which restricts fungal growth inside plants. Our results suggest a possible  
388 role for *CaProDH2* and the proline–P5C cycle in conferring resistance to the pathogen  
389 under drought conditions. Thus, our study highlights the dynamic role of proline

390 metabolism under stress in chickpea. Our findings also suggest proline accumulation as  
391 an agronomically valuable trait to generate plants with higher tolerance to combined  
392 stresses. Further investigations on the role of the proline–P5C cycle in plant responses  
393 to combined stress resistance will provide the tools to breed more tolerant crops.

394

## 395 **Experimental procedures**

### 396 **Plant materials and growth conditions**

397 Chickpea seeds (*Cicer arietinum* L. cv Pusa-362) were obtained from the Indian  
398 Agricultural Research Institute, New Delhi, and raised in pots (3 inches × 3 inches)  
399 containing 30 g air-dried peat and vermiculite (3:1 mixture [v/v]) in a plant growth  
400 chamber (PGR15; Conviron, Winnipeg, Canada) with a 12-h light/12-h dark cycle, 200  
401  $\mu\text{E m}^{-2} \text{s}^{-1}$  photon flux intensity, 22°C temperature, and 75% relative humidity (RH).

402

### 403 **Cloning and construct development**

404 For the validation of MIGS in chickpea, a phenotypic marker gene, *PHYTOENE*  
405 *DESATURASE* (*CaPDS*; XP\_012571841.1), was cloned into MIGS vector MIGS2.2  
406 (FF573) obtained from Addgene (plasmid #35248; <http://n2t.net/addgene:35248>; RRID:  
407 Addgene\_35248). Before cloning, the gene sequence was scanned through pssRNAit  
408 (<https://plantgrn.noble.org/pssRNAit/>), and the regions yielding the smallest number or  
409 potential off-targets were identified. The corresponding gene segment (1,045–1,314 bp  
410 cDNA for *CaPDS*; Supplemental Table S4) was amplified from the chickpea genome by  
411 PCR and cloned into the MIGS2.2 vector using a two-step Gateway cloning method.  
412 The first step involved cloning the *CaPDS* segment in between the attL1–L2 region of  
413 the entry vector (EV1, obtained from Dr MK Reddy, ICGEB, New Delhi, India) using  
414 conventional restriction digests and was followed by recombining the gene fragment into  
415 the MIGS2.2 vector by LR clonase (Thermo Fisher Scientific, Waltham, MA, USA)  
416 (Supplemental Figure S10). Cloning was confirmed by PCR amplification and  
417 sequencing with gene-specific primers (Supplemental Table S5). The resulting construct  
418 was transformed into *Agrobacterium tumefaciens* strain GV3101 using

419 the freeze–thaw method. As MIGS2.2 has a pGreen backbone, pSOUP was co-  
420 transformed along with the MIGS vector. A 259-bp *C. arietinum* *PROLINE*  
421 *DEHYDROGENASE2* (*CaProDH2*; 386–644 bp for *CaProDH2* GenBank Acc. No.  
422 XM\_004491715; Supplemental Table S4) gene fragment was also cloned into the MIGS  
423 vector using the same steps as above. The primers used for cloning are listed in  
424 Supplemental Table S5.

425

## 426 **Preparation of Agrobacterium cultures for plant transformation**

427

### 428 **Plant transformation**

429 Chickpea transformation was performed according to Sarmah et al. (2004) and Khandal  
430 et al. (2020), with a few modifications. Mature disease-free chickpea seeds (*C.*  
431 *arietinum* cv. Pusa-362) were surface-sterilized with ethanol (70% for 1 min) followed by  
432 mercuric chloride (0.1% for 10 min) and rinsed three to four times in sterile distilled  
433 water before soaking in sterile distilled water overnight. The primary Agrobacterium  
434 inoculum was prepared by inoculating a single colony harboring pMIGS2.2\_CaPDS,  
435 pMIGS2.2\_CaProDH2, or empty vector (pMIGS2.2 without the CcdB region) in 5 mL  
436 Luria Bertani (LB; HiMedia Laboratories, Mumbai, India) medium containing 50 mg/L  
437 each spectinomycin and rifampicin. Flasks were incubated at 28°C with shaking at 180  
438 rpm overnight. Secondary cultures were started by inoculating 50 mL LB medium with  
439 500 µL primary inoculum. Agrobacterium cells (OD<sub>600</sub> = 0.6–0.8) were harvested by  
440 centrifugation at 2,960 g for 10 min in a hybrid refrigerated centrifuge (CAX-371; Tomy,  
441 Tokyo, Japan). Cell pellets were resuspended in 50 mL Agrobacterium induction  
442 medium, which was prepared by adding 2.5 mL 1 M MES-KOH buffer pH 5.7 (HiMedia  
443 Laboratories), 100 µL 1 M MgCl<sub>2</sub> (Fisher Scientific, Newington, USA), 250 mg glucose  
444 (Amresco, Solon, OH, USA) and 100 µM acetosyringone (HiMedia Laboratories) and  
445 incubated at 25°C with shaking at 80 rpm for 3 h. The seed coat was removed and each  
446 chickpea seed was then dissected into two halves, each with one cotyledon and half of  
447 the embryonic stem, in the presence of a bacterium inoculum. The half embryos were  
448 incubated with the bacterial culture at room temperature for another 15 min, blot-dried,  
449 and transferred to full-strength MS medium, pH 5.8 (Duchefa Biochemie, Haarlem, the



450 Netherlands) (Murashige and Skoog, 1962) with 3% sucrose (Fisher Scientific) and  
451 0.8% agar. After 2 days of co-cultivation, explants with green shoots were transferred to  
452 the kanamycin selection medium. Sub-culturing was performed four times with a  
453 gradual increase in antibiotic concentrations (50, 100, 150, and 200 mg/L). Plantlets  
454 were subjected to hardening for soil establishment and grown at 20°C in a long-day  
455 photoperiod with 150  $\mu\text{mol m}^{-2} \text{s}^{-1}$  light intensity and 55%  $\pm$  2% of RH. Fully grown  
456 plants were used for experiments. The presence of the transgene was confirmed by  
457 PCR on genomic DNA using *nptII*-specific primers. Genomic DNA was isolated from the  
458 leaves of vector control plants and transformants by using DNAzol (Invitrogen,  
459 California, USA) solution and following the manufacturer's protocol.

460

#### 461 **RT-qPCR and stem-loop RT-PCR**

462 Total RNA from control and stressed samples of wild-type and *CaProDH2*-silenced  
463 plants was isolated using TRIzol reagent. First-strand cDNAs were synthesized from 2  
464  $\mu\text{g}$  of total RNA and analyzed for gene expression by RT-qPCR following the protocol  
465 described by Gupta et al., 2020. Details of the methodology followed for RT-qPCR and  
466 stem-loop RT-qPCR are given in Supplemental Methods S1. The primers for stem-loop  
467 RT-qPCR were designed according to Chen et al. (2005a) (Supplemental Table S5).

468

#### 469 **Stress treatment**

##### 470 ***Preparation of fungal inoculum and plant infection***

471 The details of *A. rabiei* inoculation are described in an earlier publication (Verma et al.,  
472 2017). The mini-dome technique described by Chen et al. (2005b) was used for *A.*  
473 *rabiei* infection of chickpea plants. Single-spore isolates of *A. rabiei* (ITCC-4638) were  
474 grown on PDA medium (HiMedia Laboratories). Spores were released from petri plates  
475 containing PDA-grown fungal cultures by adding 2 mL sterile water and incubating for  
476 15 min with frequent scraping using a sterile loop. After the suspension was filtered  
477 through muslin cloth, the spore titer was determined on a hemocytometer. The spore

478 suspension was diluted to  $1 \times 10^6$  spores  $\text{mL}^{-1}$  in sterile water. Control and drought-  
479 stressed plants (21 days old) were sprayed with the spore suspension containing 0.05%  
480 Tween-20 (HiMedia Laboratories) and 0.1% of sucrose to reduce run-off. Plants were  
481 covered with inverted translucent plastic cups to form a mini-dome for 5–6 days to  
482 maintain high humidity. Plants were then placed in a growth chamber set to  $22^\circ\text{C} \pm 2^\circ\text{C}$   
483 and  $70\% \pm 5\%$  RH with a photoperiod of 14-h light/10-h dark. Symptoms were recorded  
484 7–10 days post inoculation (DPI, Supplemental Figure S3).

485

### 486 ***Drought stress***

487 Pre-weighed 15-day-old chickpea seedlings were subjected to drought stress by the  
488 gravimetric approach (Ramegowda et al., 2013). Twice a day, pots were weighed until  
489 soil moisture content reached 30% FC ( $\Psi_w - 1.0$  MPa), after which point pots were  
490 maintained at 30% FC until the end of the experiment. Control plants were maintained  
491 at 80% FC ( $\Psi_w - 0.8$  MPa) by replenishing the amount of water lost twice a day  
492 throughout the course of the experiment. The vapor pressure deficit in the growth  
493 chamber was 0.793 kPa. The soil moisture content (i.e., FC) was calculated using the  
494 following formula, where WW is wet weight and DW is dry weight:

$$495 \text{ Field Capacity (\%)} = \frac{WW - DW}{DW} * 100 \quad \text{Eqn. 1.}$$

496

497

### 498 ***Combined stress treatment***

499 Combined stresses were applied by exposing drought-stressed plants maintained at  
500 30% FC to *A. rabiei* infection. The mouth of the pots was covered with cling wrap to  
501 avoid any water dripping onto the soil as a result of spraying. A spore suspension of  $1 \times$   
502  $10^6$  spores  $\text{mL}^{-1}$  was sprayed on drought-stressed chickpea plants until run-off. Mock-  
503 infected control and drought-stressed plants were sprayed with sterile water and  
504 covered with transparent plastic sheets to create high humidity. Pots were weighed after

505 spraying to make sure that FC was unchanged. The timeline of combined stress  
506 treatment is depicted in Supplemental Figure S3.

507

### 508 **Determination of proline and P5C content**

509 The leaves of chickpea plants subjected to control, drought, *A. rabiei*, and combined  
510 stresses were used for proline and P5C quantification. Proline content was estimated  
511 using a published protocol by Bates (1973). Tissue samples 12 days into stress  
512 treatment were ground in 2 mL 3% aqueous sulfosalicylic acid (Fisher Scientific)  
513 solution. The homogenate was filtered using whatman filter paper and mixed with 2 mL  
514 acid ninhydrin (1.25 g ninhydrin [Fisher Scientific] + 30 mL glacial acetic acid [Merck,  
515 New Jersey, USA] + 20 mL 6 M phosphoric acid [Fisher Scientific]) and 2 mL of glacial  
516 acetic acid in sterile test tubes. Tubes were heated to 100°C for 1 h and then  
517 transferred to an ice water bath to terminate the reaction. To each tube, 4 mL toluene  
518 (Fisher Scientific) was added and mixed vigorously. The upper toluene supernatant  
519 fraction was taken, and the absorbance was recorded at 520 nm. Using a proline  
520 standard curve, the concentration of proline in samples was determined and expressed  
521 on a fresh weight basis. For the standard curve, 10, 20, 40, 60, 80, and 100 µg proline  
522 was prepared, and absorbance was recorded at 520 nm (the standard graph is shown  
523 in Supplemental Figure S5). Also using liquid chromatography–mass spectrometry (LC-  
524 MS/MS) proline and P5C content were measured from stressed samples. Details of the  
525 methodology followed for GC-MS analysis are given in Supplemental Methods S1.

526

### 527 **Fungal DNA estimation**

528 Fungal DNA was quantified from plant samples according to Bayrakatar et al. (2016).  
529 Fungal genomic DNA was isolated from an *A. rabiei* culture grown at 20°C on PDA  
530 medium. For DNA extraction, cultivated mycelia (100 mg) or plant tissue samples  
531 infected with *A. rabiei* were used, and DNA was isolated using the DNAzol reagent.  
532 Using pure fungal DNA (100–0.001 ng), a standard curve was obtained by qPCR, as

533 described above, using *HEF* forward and reverse primers (450 nM). The standard curve  
534 was generated by plotting Ct values against the known fungal DNA concentration.  
535 Similarly, using the genomic DNA isolated from plant samples (diluted to 10 and 50 ng  
536 L<sup>-1</sup>), qPCR was performed and the concentration of fungal DNA determined from the Ct  
537 values and the standard curve.

538

### 539 **Microscopy observations**

540 Leaf and stem samples were collected and observed for blight lesions, cell death, fungal  
541 spores, and fungal infection under either 40× or 100× magnification using a Nikon  
542 Eclipse 80i epifluorescence microscope (Nikon Corporation, Tokyo, Japan) equipped  
543 with a Nikon digital camera (Nikon Digital Sight DSFi3, New York, USA) or using a  
544 Nikon AZ100 stereo fluorescence microscope with a 0.5× objective lens equipped with a  
545 Nikon digital camera (Nikon Digital Sight DS-Ri1).

546

### 547 **mRNA cleavage assay**

548 The miRNA173-mediated cleavage of *CaProDH2* was confirmed by 5' RLM-RACE.  
549 Total RNA from leaf tissue (100 mg, 4-week-old plants) was extracted by using the  
550 TRIzol reagent. mRNA isolation, purification, and 5' adapter ligation were performed  
551 according to Gupta et al. (2020). The resulting products were amplified using a 5'  
552 adapter forward and 3' reverse gene-specific primer, followed by confirmation of  
553 amplified fragments by sequencing and multiple sequence alignment.

554 The methodology followed for the other experiments is given in Supplemental [Methods](#)  
555 [S1](#).

556

### 557 **Mitochondrial ROS estimation**

558 Mitochondrial superoxide radicals were quantified according to Cvetkovska and  
559 Vanlerberghe (2013). Leaves from wild-type and *CaProDH2*-silenced plants subjected  
560 to drought, *A. rabiei* infection, and combined stresses were treated with 1% dimethyl  
561 sulfoxide (DMSO) for 5 min, followed by floating in 3 mM MitoSOX Red (Catalog#  
562 M36008, Fisher Scientific) and 0.35 mM MitoTracker Red CMXRos (Catalog# M7512,  
563 Fisher Scientific) solution in the dark for 30 and 20 min respectively at 37 °C. Samples  
564 were then removed from the solution, washed with sterile water and mounted onto  
565 slides and examined on a Laser Scanning Microscope (AOBS TCS-SP5, LEICA  
566 GERMANY) with appropriate excitation/detection settings (MitoSOX Red, 488/585–615  
567 nm; MitoTracker Red, 543/585–615 nm).

568

### 569 **Statistical analysis**

570 Data presented in this manuscript were analyzed using GraphPad Prism 7  
571 (<https://graphpad.com/scientific-software/prism/>) and MSTAT-C  
572 (<https://msu.edu/~freed/mstatac.htm>) software. Significant differences between  
573 genotypes and across the treatments were tested by ANOVA, followed by Duncan's  
574 multiple range test (DMRT) ( $p < 0.05$ ). Raw data of all figures and tables presented in  
575 this manuscript are given in Supplemental File S3.

576

### 577 **Accession numbers**

578 PDS (XM\_012716387), ProDH2 (XM\_004491715).

579

### 580 **Acknowledgments**

581 Projects in the MS-K lab are supported by the National Institute of Plant Genome  
582 Research core funding. PP, MP, and VI acknowledge SERB (SERB/LS-359/2014),  
583 CSIR (No.13 (9064-A)/2019-Pool), and DBT- JRF (DBT/2015/NIPGR/430), respectively.  
584 We thank Dr Sandhya Verma and Ms Ankita Shree for their help in carrying out the

585 fungal infections. We acknowledge Dr Debasis Chattopadhyay and Dr Santosh Kumar  
586 Gupta for providing the chickpea transformation protocol and transgenic facility for plant  
587 genetic transformation support. We also thank Ms Anju Udhay, Mr Pandiyan  
588 Muthuramalingam, Mr Masthan Basha and Mr Sombir Rao for their technical help. We  
589 also thank Mr Sundar, Mr Rahim, Mr Prem Negi and Mr Ashok Kumar for technical help  
590 at the field and central instrumentation facility. We acknowledge DBT-eLibrary  
591 Consortium (DeLCON) and NIPGR library for providing access to e-resources and  
592 NIPGR Plant Growth Facility for plant growth support.

593

#### 594 **Legends for supporting information**

595 **Supplemental File S1.** List of differentially expressed genes (DEGs) common to  
596 drought stress and *Ascochyta* infection, as analyzed by SAM and INMEX, and targets of  
597 predicted tasiRNAs resulting from the expression of the MIGS\_*CaProDH2* construct, as  
598 analyzed by psRNAtarget.

599 **Supplemental File S2.** List of DEGs in MIGS\_*CaPDS* transgenic plants relative to wild-  
600 type plants.

601 **Supplemental File S3.** Raw data of all figures presented in this study.

602 **Supplemental Table S1.** List of studies on the effect of drought or *A. rabiei* infection on  
603 the transcriptome of chickpea plants.

604 **Supplemental Table S2.** List of DEGs commonly shared by drought and *A. rabiei*  
605 infection, as determined through meta-analysis of microarray data sets of individual  
606 responses to drought or *A. rabiei* infection.

607

608 **Supplemental Table S3.** List of genes involved in photosynthesis, light signaling, and  
609 cell cycle, with their expression estimates in the MIGS (vector control) line, as compared  
610 to wild-type.

611

612 **Supplemental Table S4.** Details of marker and target genes selected for cloning into  
613 the MIGS2.2 vector.

- 614 **Supplemental Table S5.** List of primers used in this study.
- 615 **Supplemental Figure S1.** Incidence of Ascochyta blight under well-watered and  
616 drought-stress conditions in the field.
- 617 **Supplemental Figure S2.** Ascochyta blight (AB) disease symptoms in field conditions,  
618 isolation of *A. rabiei* and confirmation of AB disease in chickpea fields.
- 619 **Supplemental Figure S3.** Details of protocol followed to impose combined stress and  
620 analysis of stress response.
- 621 **Supplemental Figure S4.** Assessment of disease severity in plants subjected to  
622 pathogen only and combined-stress treatments.
- 623 **Supplemental Figure S5.** Standard curve used to determine the extent of fungal  
624 infection in stressed samples using pure fungal genomic DNA.
- 625 **Supplemental Figure S6.** Response of chickpea plants to drought recovery.
- 626 **Supplemental Figure S7.** Establishment of MS medium-based combined stress  
627 imposition protocol.
- 628 **Supplemental Figure S8.** Flow chart depicting the steps involved in the meta-analysis  
629 of transcriptomic data under individual drought or *A. rabiei* infection stress.
- 630 **Supplemental Figure S9.** Meta-analysis of transcript levels under individual drought or  
631 *A. rabiei* infection stress.
- 632 **Supplemental Figure S10.** Transcriptome profiling of genes selected from meta-  
633 analysis.
- 634 **Supplemental Figure S11.** Schematic representation of miR173-mediated generation  
635 of tasiRNAs in plants.
- 636 **Supplemental Figure S12.** Schematic representation of the vectors and constructs  
637 used in this study.

638 **Supplemental Figure S13.** Methodology followed for the development of chickpea  
639 transformation.

640 **Supplemental Figure S14.** Analysis of MIGS\_*CaPDS* transgenic plants.

641 **Supplemental Figure S15.** Schematic representation of miR173-mediated cleavage  
642 and generation of predicted tasiRNAs.

643 **Supplemental Figure S16.** Effect of *CaPDS* silencing on the carotenoid biosynthetic  
644 pathway.

645 **Supplemental Figure S17.** Assessment of kanamycin sensitivity, *CaProDH2* gene  
646 expression, and southern analysis of MIGS\_*CaProDH2* transgenic plants.

647 **Supplemental Figure S18.** Expression of tasiRNAs in transgenic and vector control  
648 plants.

649 **Supplemental Figure S19.** Assessment of combined stress responses in  
650 MIGS\_*CaProDH2* transgenic plants.

651 **Supplemental Figure S20.** Stages of *A. rabiei* infection in chickpea.

652 **Supplemental Figure S21.** Schematic representation of the different stages of *A. rabiei*  
653 infection in chickpea.

654 **Supplemental Figure S22.** Analysis of transient overexpressed *CaProDH2* plants.

655 **Supplemental Figure S23.** Superoxide production and colocalization with mitochondria  
656 in *CaProDH2*-silenced and wild-type plants.

657 **Supplemental Figure S24.** Model of the influence of drought stress on *A. rabiei* soil  
658 inoculum and plant infection under field conditions.

## 659 **Figures**

660 **Figure 1. Drought imparts tolerance to *Ascochyta rabiei* infection.** (A) Disease  
661 symptoms observed in chickpea plants grown in a growth room and exposed to  
662 pathogen only or combined stress in pots. Disease symptoms were documented 16



Figure 1

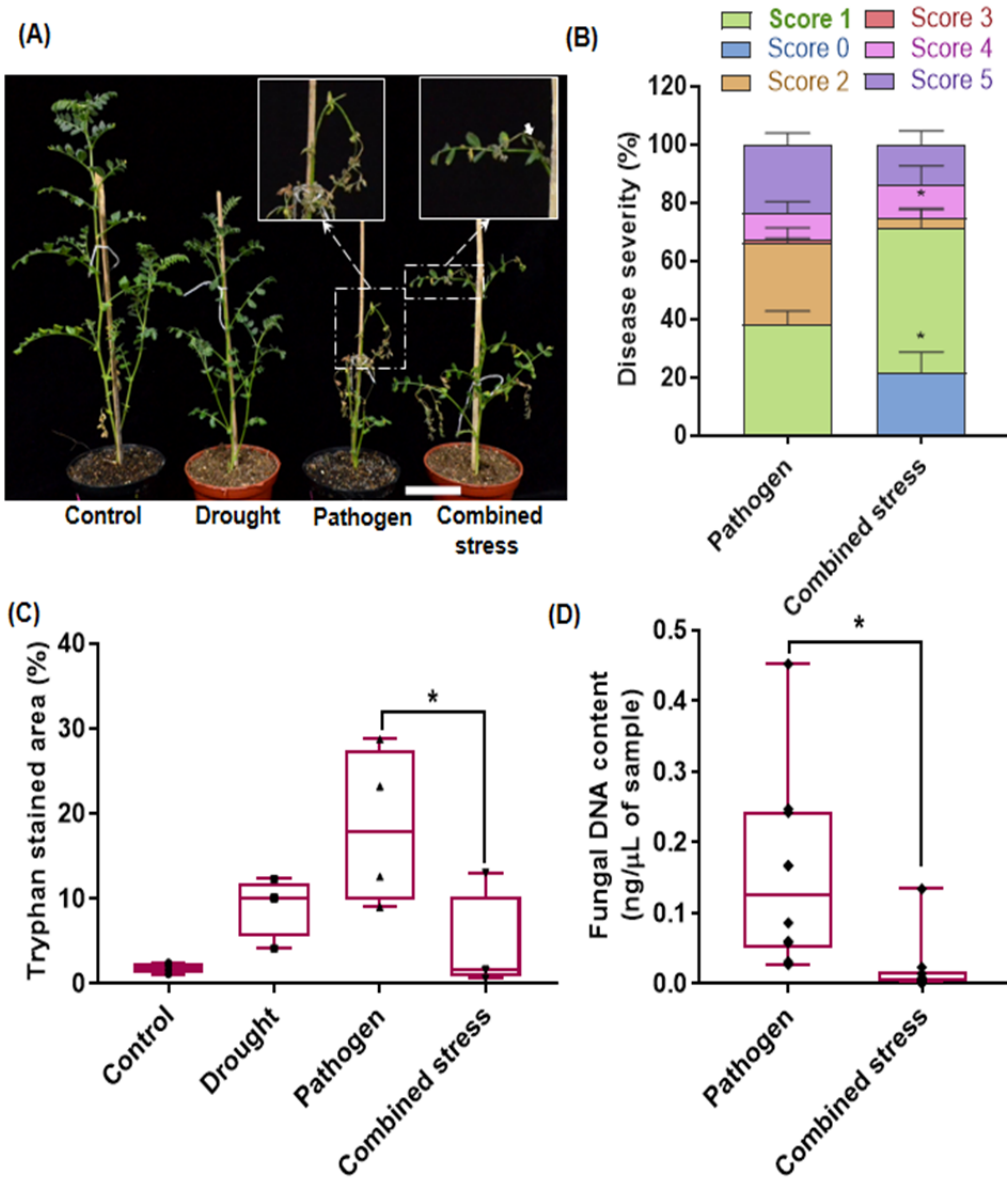

663 days after onset of stress. Insets, enlarged view of infected leaves, with necrotic lesions

664 (indicated by the white arrow). (B) Assessment of disease severity in plants exposed to  
665 pathogen only or combined stresses 16 days after onset of stress, on a scale of 0 to 5.  
666 Disease scoring was carried out as described in Supplemental Figure S4. (C) Extent of  
667 cell death in infected leaves, as quantified by trypan blue–stained areas under  
668 pathogen-only or combined stresses. Quantification was performed using ImageJ  
669 software (<https://imagej.nih.gov/ij/>). (D) *In planta* fungal DNA content in infected leaves  
670 exposed to pathogen-only or combined stresses at 8 days after onset of stress, using *A.*  
671 *rabiei* specific translation elongation factor (EF) primer listed in the supplemental  
672 information. Absolute quantification values are presented here, based on the standard  
673 curve of fungal DNA shown in Supplemental Figure S5. Plant DNA of 50 ng/μL was  
674 used in qPCR. Asterisks indicate statistical significance at  $p < 0.05$ . The error bar  
675 indicates SEM. Experiments were repeated at least twice, with a minimum of three  
676 technical replicates. Statistical analyses were performed using one-way ANOVA (1C)  
677 and student t-test (1B, 1D), and significance is reported at  $p < 0.05$ .

678

679 **Figure 2. Physiological and biochemical analysis of plants subjected to combined**  
680 **stresses.** (A) Proline and P5C content in wild-type plants subjected to different stress  
681 conditions. Chickpea plants were exposed to drought, pathogen, or combined stresses,  
682 as described in Supplemental Figure S3, and samples were collected 7 days post-  
683 infection to measure proline and P5C contents by liquid chromatography–mass  
684 spectrometry (LC-MS/MS). (B) Relative transcript levels of genes from the proline  
685 biosynthetic pathway in wild-type plants under stress, as determined by RT-qPCR.  
686 Samples were collected at 72 h and 7 d post-infection. Results are presented in log10  
687 fold-change. The experiments were repeated three times with a minimum of three  
688 technical replicates. Different letters indicate a significant difference between  
689 treatments. Error bar indicates SEM. One-way ANOVA, followed by Duncan's multiple  
690 range test, was performed, and significance is reported at  $p < 0.05$ . *P5CS*,  $\delta$ -1-  
691 *pyrroline-5-carboxylate synthase*; *P5CR*, *pyrroline-5-carboxylate reductase*; *PT1*,  
692 *proline transporter 1*; *P5CDH*,  $\delta$ -1-*pyrroline-5-carboxylate dehydrogenase*; *ProDH*,  
693 *proline dehydrogenase*; *OAT*, *ornithine aminotransferase*.

Figure 2

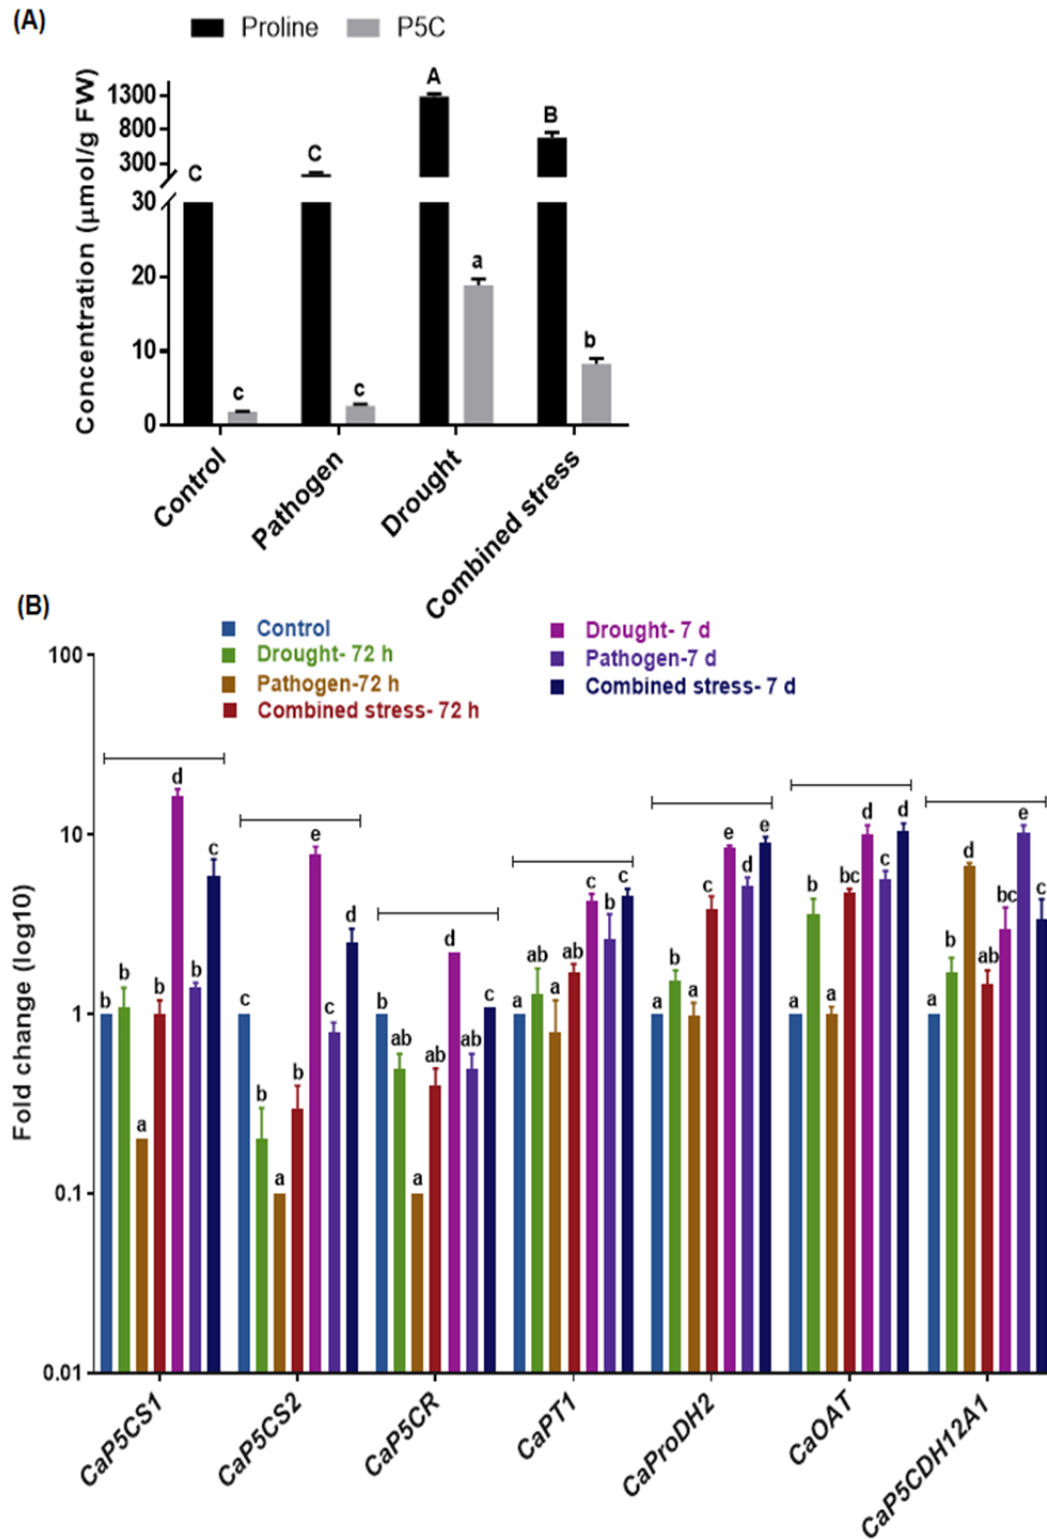

694 Figure 3. Molecular characterization of MIGS\_CaProDH2 transgenic lines. (A)

Figure 3

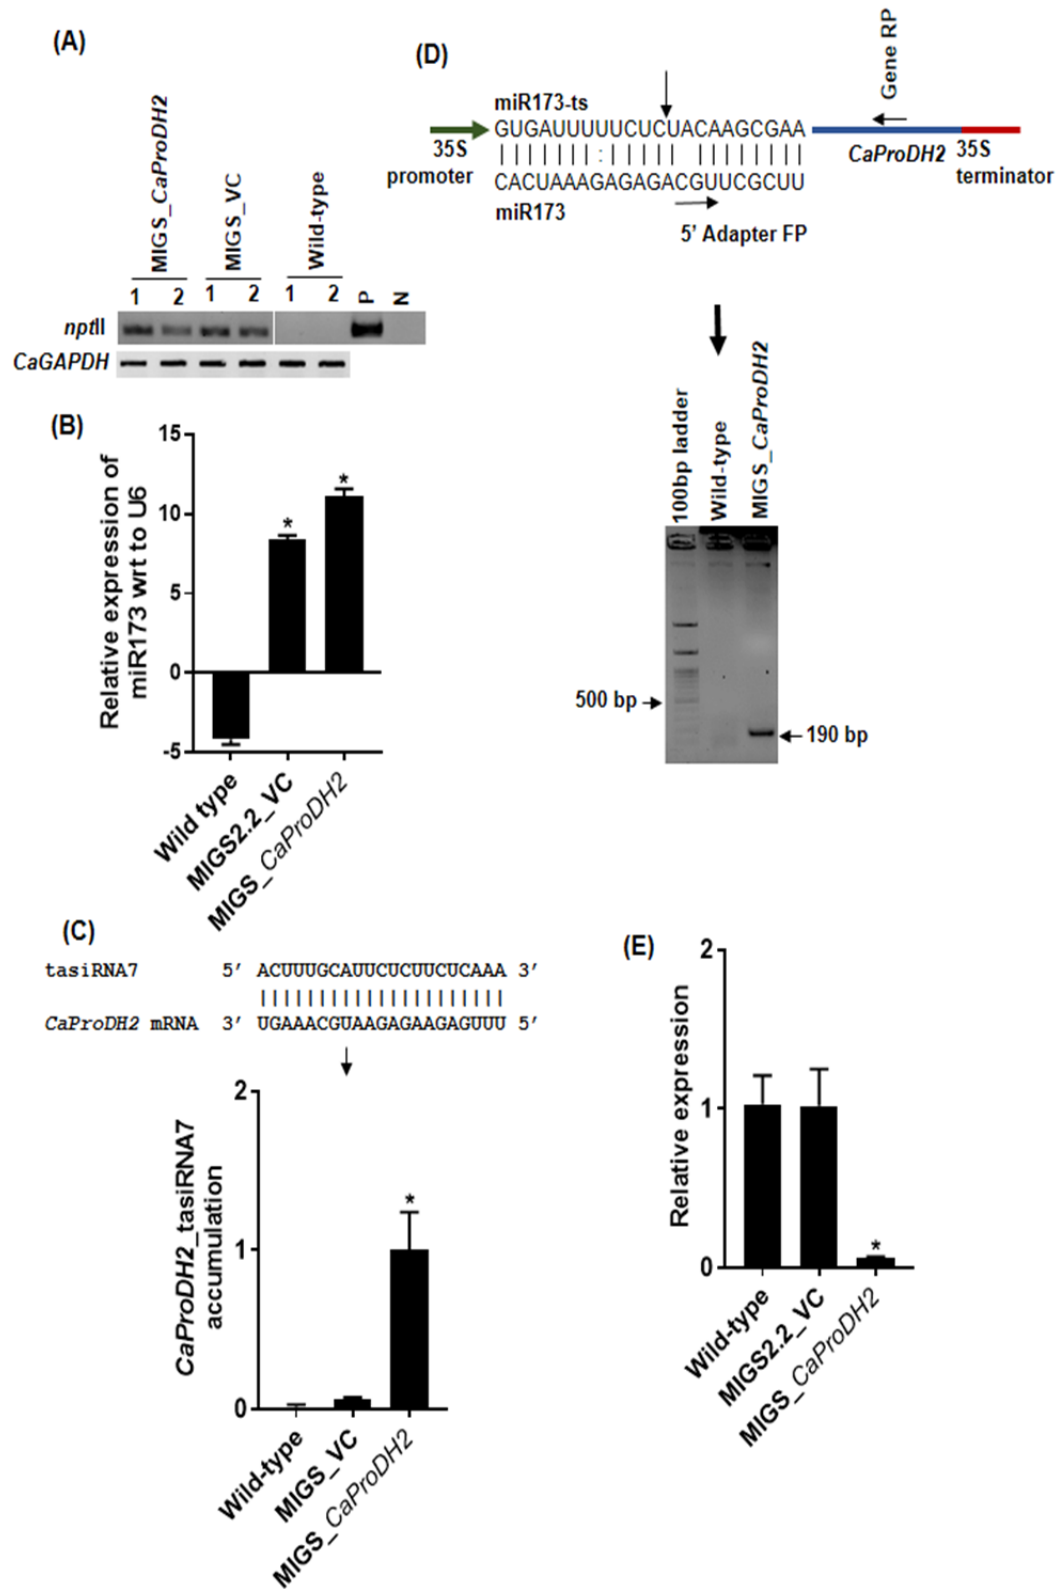

695 Agarose gel of the *nptII* PCR amplicon in MIGS\_ *CaProDH2* and MIGS\_ *VC* plants.

696 *CaGAPDH* was used as control for the PCR. Numbers 1 and 2 indicate independent  
697 transgenic events. *nptII*, *neomycin transferase II*; P, positive control (vector plasmid  
698 DNA); N, negative control. (B) Relative expression level of miR173, as determined by  
699 stem-loop RT-qPCR and (C) miR173-induced phased tasiRNA7 accumulation in  
700 *CaProDH2*-silenced, MIGS\_VC, and wild-type plants. U6 snRNA (XR\_001143939) was  
701 used as a reference. (D) Schematic representation of the miR173-binding site, 5'  
702 adapter forward primer, and *CaProDH2* reverse primer used for 5' RLM-RACE and  
703 confirmation of cleavage (product size 190 bp) in *CaProDH2*-silenced plants. (E) Fold-  
704 change in transcript abundance of *CaProDH2* in MIGS\_*CaProDH2*, MIGS\_VC, and  
705 wild-type plants. Experiments were repeated at least twice, with a minimum of three  
706 technical replicates each time. The error bar indicates SEM. Student's *t*-test was  
707 employed, and significance is reported at  $p < 0.05$ .

708 **Figure 4. Drought-induced resistance to *Ascochyta rabiei* infection is abolished in**  
709 ***CaProDH2*-silenced plants.** (A) Representative photographs of wild-type and  
710 *CaProDH2*-silenced plant leaves subjected to pathogen infection or combined stresses.  
711 Stress treatments were imposed as described in Supplemental Figure S3, and disease  
712 symptoms were photographed at 13 days post inoculation (DPI). White arrows indicate  
713 necrotic blight symptoms on the rachis and leaves. (B) Disease incidence and (C)  
714 fungal DNA content in plants exposed to pathogen only or to combined stresses.  
715 Disease incidence was calculated by following the method described in Supplemental  
716 Figure S4. *In planta* fungal DNA was quantified in leaf samples using a primer specific  
717 to the elongation factor gene of *A. rabiei* at 8 DPI. Absolute quantification values are  
718 presented. (D) Number of different pathogenesis events observed in wild-type and  
719 transgenic plants under pathogen or combined stresses. Infected leaves were collected  
720 and stained with trypan blue, and images at various stages of infection were captured  
721 under a 100× objective on a Nikon 80i epifluorescent microscope. Red arrow,  
722 germination of spores; black arrow, germ tube penetration; purple arrow, pycnidia  
723 formation. Different letters indicate a significant difference between the treatments and  
724 genotypes. The error bar indicates SEM. Experiments were repeated at least twice, with  
725 a minimum of three technical replicates. Two-way ANOVA, followed by Duncan's  
726 multiple range test, was performed, and significance was reported at  $p < 0.05$ .

Figure 4

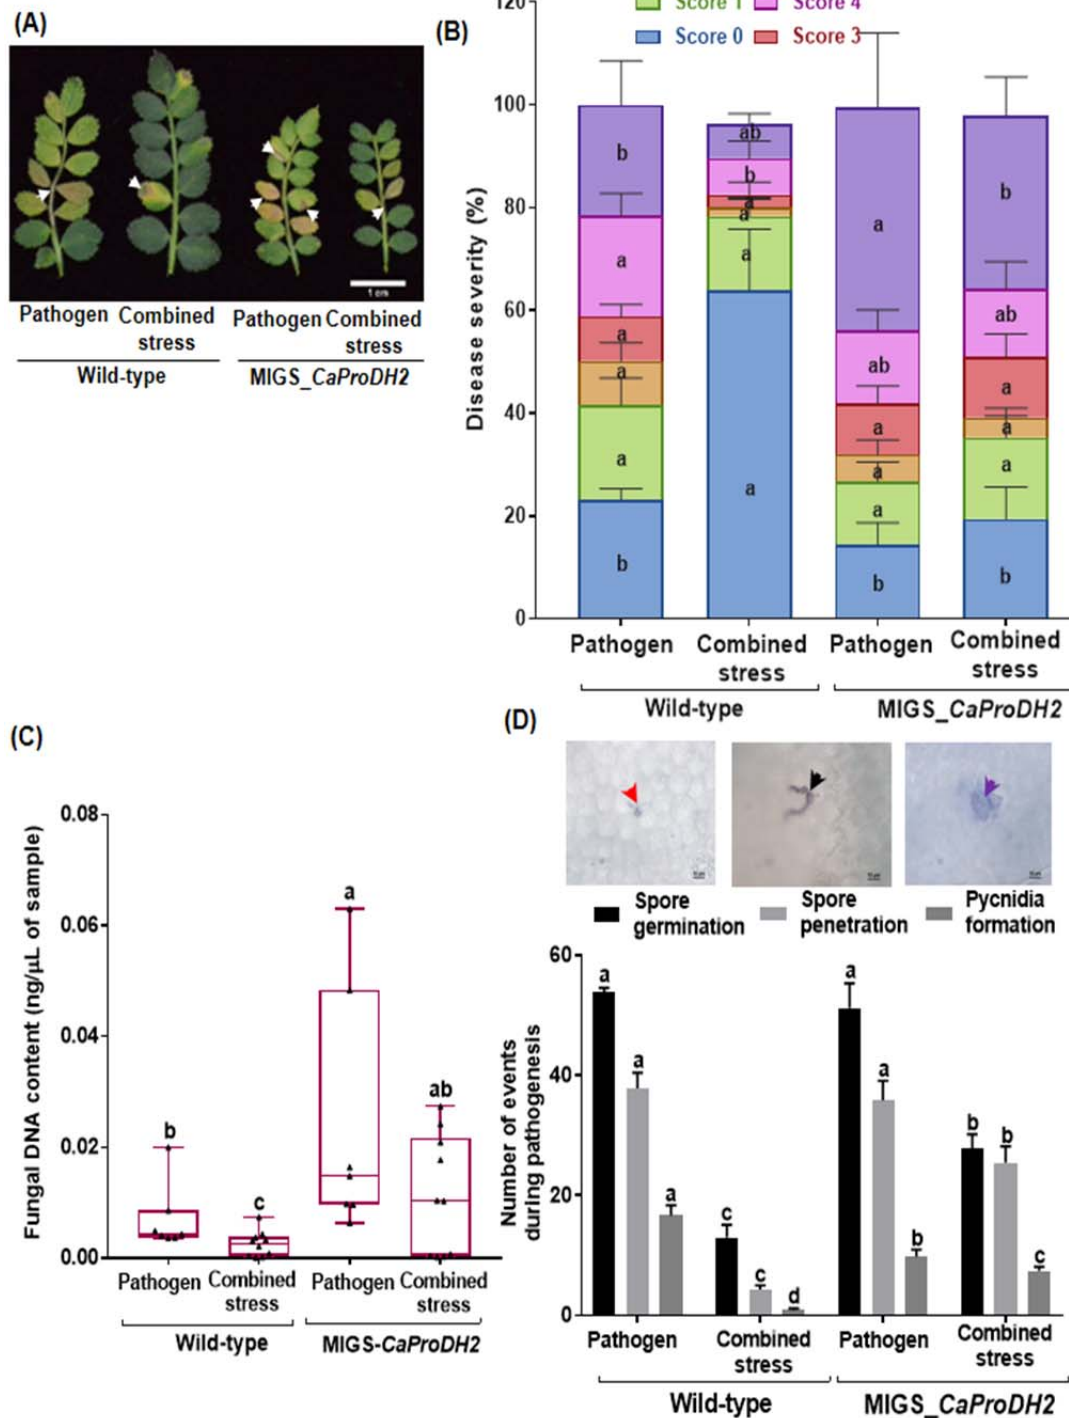

727 Figure 5. Proline, P5C, and mitochondrial ROS levels in *CaProDH2*-silenced

Figure 5

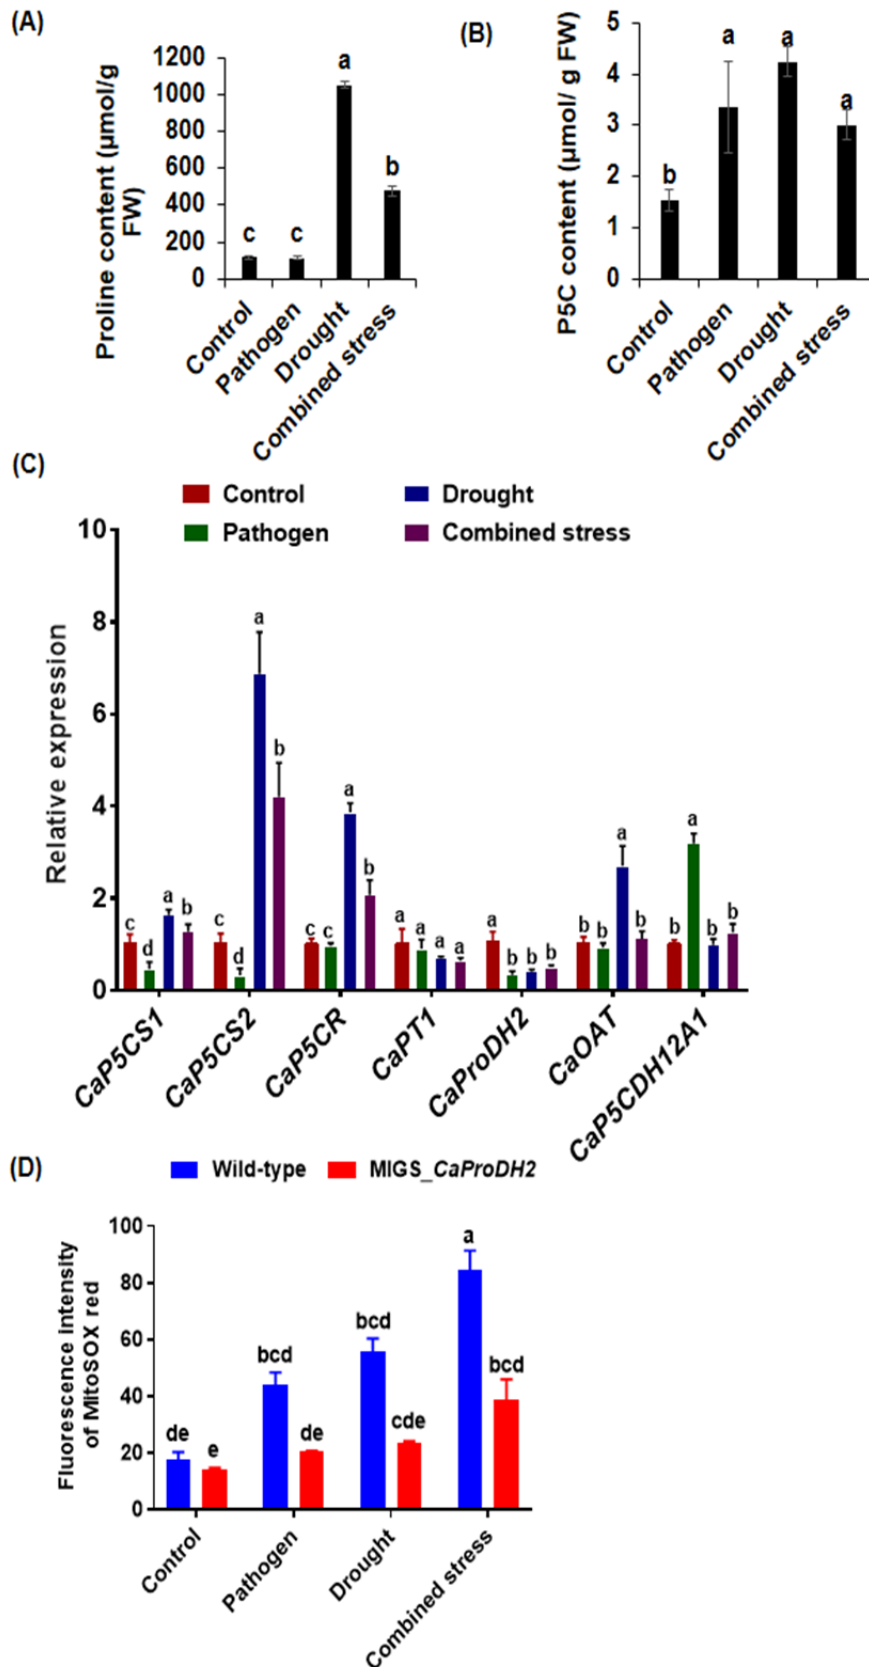

728 **plants.** (A) Accumulation of proline and (B) P5C in wild-type and *CaProDH2*-silenced

Figure 6

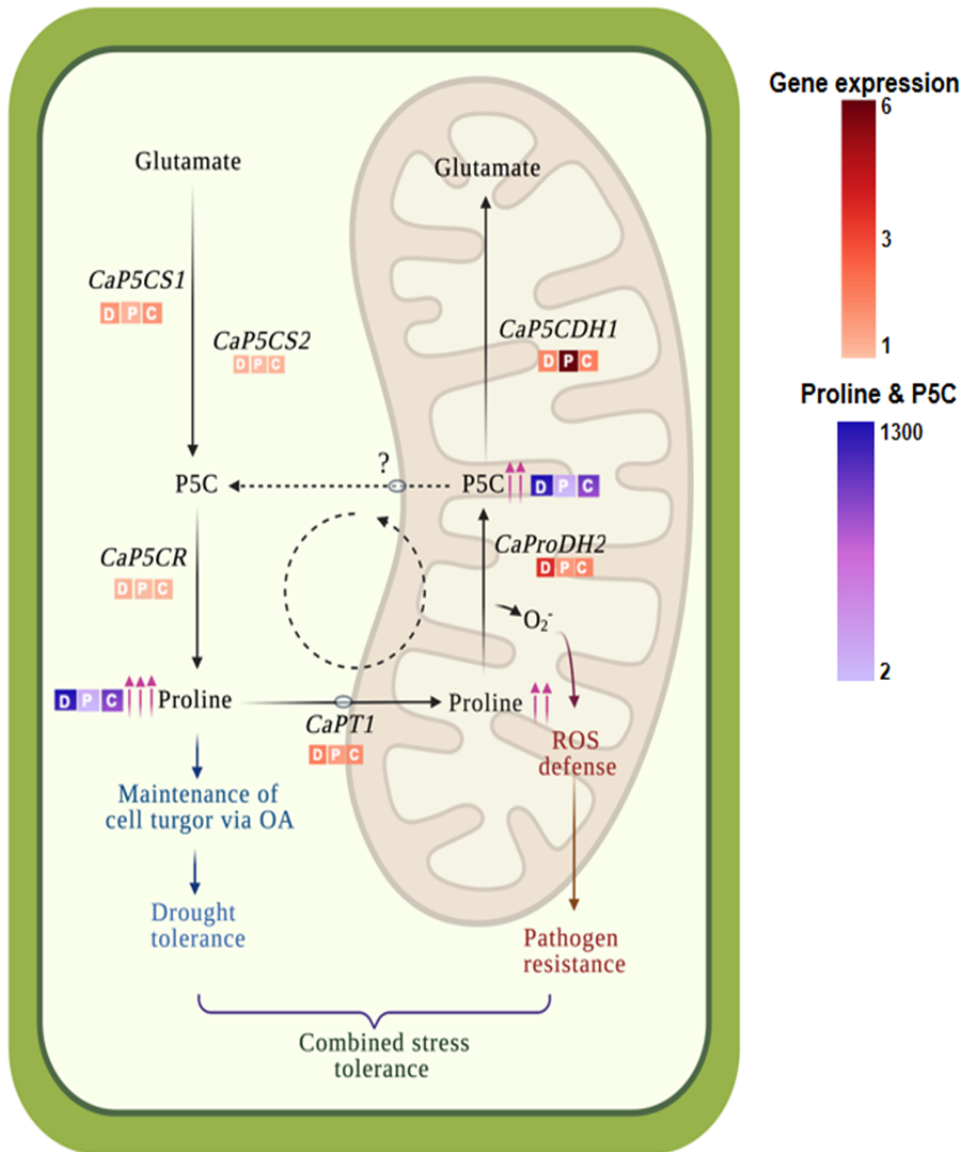

729 plants subjected to stress treatments. (C) Semi-quantitative expression of proline



730 biosynthetic genes in *CaProDH2*-silenced plants. (D) Mitochondrial ROS accumulation  
731 in wild-type and *CaProDH2*-silenced plants. Different letters indicate a significant  
732 difference between the treatments and genotypes. The error bar indicates SEM.  
733 Experiments were repeated at least twice, with a minimum of three technical replicates.  
734 Two-way ANOVA, followed by Duncan's multiple range test, was performed, and  
735 significance was reported at  $p < 0.05$ .

736 **Figure 6. *CaProDH2*-mediated mitochondrial P5C regulation in chickpea plants**  
737 **subjected to combined drought and *Ascochyta rabiei* infection.** Proposed model  
738 showing the regulation of the proline–P5C cycle in chickpea plants subjected to  
739 combined drought and *A. rabiei* infection. Cytosolic proline content increases in  
740 response to drought and serves as an osmolyte to maintain cell turgor, thereby  
741 conferring drought tolerance. Accumulated proline is also transported to mitochondria  
742 and converted into P5C by *CaProDH2*. This conversion and resulting increase in P5C  
743 level leads to the production of ROS molecules, thus inducing ROS-mediated pathogen  
744 defense responses. We observed an enhanced expression of genes involved in proline  
745 biosynthesis (*CaP5CS1*, *CaP5CS2*, *CaP5CR*), transport (*CaPT1*), and oxidization  
746 (*CaProDH2*) and higher P5C accumulation under drought and combined stress  
747 conditions. Together, increased cytosolic proline content and mitochondrial P5C with  
748 ROS enhance the resistance of chickpea plants to *A. rabiei* infection under drought  
749 stress. Blue and purple color scale, proline and P5C contents under drought (D),  
750 pathogen (P), and combined stresses (C). Red gradient color scale, expression levels of  
751 *P5CS* ( $\delta$ -1-pyrroline-5-carboxylate synthase); *P5CR* (pyrroline-5-carboxylate  
752 reductase); *PT1* (proline transporter 1); *P5CDH* ( $\delta$ -1-pyrroline-5-carboxylate  
753 dehydrogenase); and levels of P5C (1-pyrroline-5-carboxylic acid) under drought (D),  
754 pathogen (P), and combined stresses (C).

## Parsed Citations

- Achuo, E.A, Prinsen, E. and Höfte, M. (2006)** Influence of drought, salt stress and abscisic acid on the resistance of tomato to *Botrytis cinerea* and *Oidium neolycopersici*. *Plant Pathol.* 55, 178-186  
Google Scholar: [Author Only](#) [Title Only](#) [Author and Title](#)
- Ayoubi, N. and Soleimani M.J. (2014)** Possible effects of pathogen inoculation and salicylic acid pre-treatment on the biochemical changes and proline accumulation in green bean. *Arch. Phytopathol. Plant Prot.* 48, 212–222  
Google Scholar: [Author Only](#) [Title Only](#) [Author and Title](#)
- Bates, L.S., Waldren, R.P. and Teare, I.D. (1973)** Rapid determination of free proline for water-stress studies. *Plant Soil* 39, 205–207  
Google Scholar: [Author Only](#) [Title Only](#) [Author and Title](#)
- Bayraktar, H., Ozer, G., Aydoğan, A. and Palacioglu, G. (2016)** Determination of *Ascochyta* blight disease in chickpea using real-time PCR. *J Plant Dis Prot.* 123, 109–117  
Google Scholar: [Author Only](#) [Title Only](#) [Author and Title](#)
- Benstein, R. M., Ludewig, K., Wulfert, S., Wittek, S., Gigolashvili, T., Frerigmann, H., Gierth, M., Flügge, U. I., and Krueger, S. (2013)** *Arabidopsis* phosphoglycerate dehydrogenase1 of the phosphoserine pathway is essential for development and required for ammonium assimilation and tryptophan biosynthesis. *Plant Cell* 25(12), 5011–5029  
Google Scholar: [Author Only](#) [Title Only](#) [Author and Title](#)
- Bhatti, M.A and Kraft, J.M. (1992)** Effects of inoculum density and temperature on root rot and wilt of chickpea. *Plant Dis.* 76, 50–54  
Google Scholar: [Author Only](#) [Title Only](#) [Author and Title](#)
- Bidzinski, P., Ballini, E., Ducasse, A., Michel, C., Zuluaga, P., Genga, A., Chiozzotto, R. and Morel, J. -B. (2016)** Transcriptional Basis of Drought-Induced Susceptibility to the Rice Blast Fungus *Magnaporthe oryzae*. *Front. Plant Sci.* 7, 1558  
Google Scholar: [Author Only](#) [Title Only](#) [Author and Title](#)
- Cecchini N. M., Monteoliva M. I. and Alvarez M. E. (2011)** Proline dehydrogenase contributes to pathogen defense in *Arabidopsis*. *Plant Physiol.* 155, 1947–1959  
Google Scholar: [Author Only](#) [Title Only](#) [Author and Title](#)
- Chen, C. and Dickman, M. B. (2005).** Proline suppresses apoptosis in the fungal pathogen *Colletotrichum trifolii*. *Proc. Natl. Acad. Sci. U.S.A* 102, 3459–3464.  
Google Scholar: [Author Only](#) [Title Only](#) [Author and Title](#)
- Chen, C., Ridzon, D. A., Broomer, A. J., Zhou, Z., Lee, D. H., Nguyen, J. T., Barbisin, M., Xu, N. L., Mahuvakar, V. R., Andersen, M. R., Lao, K. Q., Livak, K. J., & Guegler, K. J. (2005a)** Real-time quantification of microRNAs by stem-loop RT-PCR. *Nucleic Acids Res.* 33(20), e179.  
Google Scholar: [Author Only](#) [Title Only](#) [Author and Title](#)
- Chen, W., Mcphee, K.E. and Muehlbauer, F.J. (2005b).** Use of a mini-dome bioassay and grafting to study resistance of chickpea to *Ascochyta* blight. *J. Phytopathol.* 153, 579-587.  
Google Scholar: [Author Only](#) [Title Only](#) [Author and Title](#)
- Coram, T.E. and Pang, E.C. (2006)** Expression profiling of chickpea genes differentially regulated during a resistance response to *Ascochyta rabiei*. *Plant Biotechnol. J.* 4, 647– 666.  
Google Scholar: [Author Only](#) [Title Only](#) [Author and Title](#)
- Conesa, A, and Götz, S. (2008).** Blast2GO: A comprehensive suite for functional analysis in plant genomics. *Int. J. Plant Genomics*, 619832.  
Google Scholar: [Author Only](#) [Title Only](#) [Author and Title](#)
- Cvetkovska M, Vanlerberghe GC. (2012)** Alternative oxidase modulates leaf mitochondrial concentrations of superoxide and nitric oxide. *New Phytologist* 195(1),32-39.  
Google Scholar: [Author Only](#) [Title Only](#) [Author and Title](#)
- de Felippes, F. F., Wang, J. and Weigel, D. (2012)** MIGS: miRNA-induced gene silencing. *Plant J.* 70, 541– 547.  
Google Scholar: [Author Only](#) [Title Only](#) [Author and Title](#)
- Fabro, G., Kovacs, I., Pavet, V., Szabados, L. and Alvarez, M. E. (2004).** Proline accumulation and *AtP5CS2* gene activation are induced by plant-pathogen incompatible interactions in *Arabidopsis*. *Mol. Plant Microbe Interact.* 17, 343–350.  
Google Scholar: [Author Only](#) [Title Only](#) [Author and Title](#)
- Gupta, A, Patil, M., Qamar, A, and Senthil-Kumar M. (2020)** ath-miR164c influences plant responses to the combined stress of drought and bacterial infection by regulating proline metabolism. *Environ. Exp. Bot.* 172, 103998  
Google Scholar: [Author Only](#) [Title Only](#) [Author and Title](#)
- Han, Y., Zhang, B., Qin, X., Li, M. and Guo, Y. (2015)** Investigation of a miRNA-Induced Gene Silencing Technique in *Petunia* Reveals Alterations in miR173 Precursor Processing and the Accumulation of Secondary siRNAs from Endogenous Genes. *PLoS ONE* 10(12), e0144909  
Google Scholar: [Author Only](#) [Title Only](#) [Author and Title](#)

- Henares, B. M., Debler, J. W., Farfan-Caceres, L. M., Grime, C. R., and Lee, R. C. (2019) *Agrobacterium tumefaciens*-mediated transformation and expression of GFP in *Ascochyta lentis* to characterize *ascochyta* blight disease progression in lentil. *PLoS One* 14(10), e0223419  
Google Scholar: [Author Only](#) [Title Only](#) [Author and Title](#)
- Ilarslan, H. and Dolar, F.S. (2002) Histological and Ultrastructural Changes in Leaves and Stems of Resistant and Susceptible Chickpea Cultivars to *Ascochyta rabiei*. *J. Phytopathol.* 150, 340–348  
Google Scholar: [Author Only](#) [Title Only](#) [Author and Title](#)
- Jaiswal, P., Cheruku, J.R., Kumar, K., Yadav, S., Singh, A Kumari, P., Dube, S.C., Upadhyaya, K.C. and Verma, P.K. (2012) Differential transcript accumulation in chickpea during early phases of compatible interaction with a necrotrophic fungus *Ascochyta rabiei*. *Mol. Biol. Rep.* 39, 4635-4646  
Google Scholar: [Author Only](#) [Title Only](#) [Author and Title](#)
- Khandal, H., Gupta, S.K., Dwivedi, V., Mandal, D., Sharma, N.K., Vishwakarma, N.K., Pal, L., Choudhary, M., Francis, A., Malakar, P., Singh, N.P., Sharma, K., Sinharoy, S., Singh, N.P., Sharma, R. and Chattopadhyay, D. (2020) Root-specific expression of chickpea cytokinin oxidase/dehydrogenase 6 leads to enhanced root growth, drought tolerance and yield without compromising nodulation. *Plant Biotechnol. J.* DOI: <https://doi.org/10.1111/pbi.13378>.  
Google Scholar: [Author Only](#) [Title Only](#) [Author and Title](#)
- Kishor, P.K., Sangam, S., Amrutha, R., Laxmi, P.S., Naidu, K., Rao, K., Rao, S., Reddy, K., Theriappan, P. and Sreenivasulu, N. (2005) Regulation of proline biosynthesis, degradation, uptake and transport in higher plants: its implications in plant growth and abiotic stress tolerance. *Curr. Sci.* 88, 424–438  
Google Scholar: [Author Only](#) [Title Only](#) [Author and Title](#)
- Liang, X., Zhang, L., Natarajan, S. K., and Becker, D. F. (2013) Proline mechanisms of stress survival. *Antioxid. Redox Signal.* 19(9), 998–1011  
Google Scholar: [Author Only](#) [Title Only](#) [Author and Title](#)
- Mantri, N. L., Ford, R., Coram, T. E., and Pang, E. C. (2007) Transcriptional profiling of chickpea genes differentially regulated in response to high-salinity, cold and drought. *BMC Genomics* 8, 303  
Google Scholar: [Author Only](#) [Title Only](#) [Author and Title](#)
- Markell S, Khan M, Secor G, Gulya T, Lamey A (2008) Row crop diseases in drought years NSDU-PP1371. <http://www.ag.ndsu.edu/publications/landing-pages/crops/row-crop-diseasesin-drought-years-pp-1371>.  
Google Scholar: [Author Only](#) [Title Only](#) [Author and Title](#)
- Miller, G., Honig, A, Stein, H., Suzuki, N., Mittler, R. and Zilberstein, A. (2009) Unraveling delta1-pyrroline-5-carboxylate-proline cycle in plants by uncoupled expression of proline oxidation enzymes. *J. Biol. Chem.* 289, 26482–26492  
Google Scholar: [Author Only](#) [Title Only](#) [Author and Title](#)
- Monteoliva, M. I., Rizzi, Y. S., Cecchini, N. M., Hajirezaei, M. R. and Alvarez M. E. (2014) Context of action of proline dehydrogenase (ProDH) in the hypersensitive response of *Arabidopsis*. *BMC Plant Biol.* 14, 21  
Google Scholar: [Author Only](#) [Title Only](#) [Author and Title](#)
- Nizam, S., Singh, K. and Verma, P.K. (2010) Expression of the fluorescent proteins DsRed and EGFP to visualize early events of colonization of the chickpea blight fungus *Ascochyta rabiei*. *Curr Genet.* 56, 391–399  
Google Scholar: [Author Only](#) [Title Only](#) [Author and Title](#)
- Pande, S., Siddique, K.H.M., Kishore, G.K. et al., 2005. *Ascochyta* blight of chickpea (*Cicer arietinum* L.): a review of biology, pathogenicity, and disease management. *Aust. J. Agric. Res.* 56, 317–32  
Google Scholar: [Author Only](#) [Title Only](#) [Author and Title](#)
- Pandey, B.K., Singh, U.S., and Chaube, H.S. (1987) Mode of infection of *Ascochyta* blight as caused by *Ascochyta rabiei*. *J. Phytopathol.* (Berlin) 119, 88–93  
Google Scholar: [Author Only](#) [Title Only](#) [Author and Title](#)
- Pandey, P., Ramegowda, V., and Senthil-Kumar, M. (2015) Shared and unique responses of plants to multiple individual stresses and stress combinations: physiological and molecular mechanisms. *Front. Plant Sci.* 6,723.  
Google Scholar: [Author Only](#) [Title Only](#) [Author and Title](#)
- Pandey, P., Irulappan, V., Bagavathiannan, M.V. and Senthil-Kumar, M. (2017) Impact of combined abiotic and biotic stresses on plant growth and avenues for crop improvement by exploiting physio-morphological traits. *Front. Plant Sci.* 8, 537.  
Google Scholar: [Author Only](#) [Title Only](#) [Author and Title](#)
- Qamar, A, Mysore, K. S., and Senthil-Kumar, M. (2015). Role of proline and pyrroline-5-carboxylate metabolism in plant defense against invading pathogens. *Front. Plant Sci.* 6, 503.  
Google Scholar: [Author Only](#) [Title Only](#) [Author and Title](#)
- Ramegowda, V. and Senthil-Kumar, M. (2015) The interactive effects of simultaneous biotic and abiotic stresses on plants: mechanistic understanding from drought and pathogen combination. *J. Plant Physiol.* 176, 47–54.  
Google Scholar: [Author Only](#) [Title Only](#) [Author and Title](#)

**Ramegowda, V., Senthil-Kumar, M., Ishiga, Y., Kaundal, A., Udayakumar, M. and Mysore, K. S. (2013). Drought stress acclimation imparts tolerance to *Sclerotinia sclerotiorum* and *Pseudomonas syringae* in *Nicotiana benthamiana*. *Int. J. Mol. Sci.* 14, 9497–9513.**

Google Scholar: [Author Only Title Only Author and Title](#)

**Rea, G., Metoui, O., Infantino, A., Federico, R., Angelini, R. (2002). Copper amine oxidase expression in defense responses to wounding and *Ascochyta rabiei* invasion. *Plant Physiol.* 128(3), 865–875.**

Google Scholar: [Author Only Title Only Author and Title](#)

**Rizzi, Y. S., Cecchini, N. M., Fabro, G., and Alvarez, M. E. (2017). Differential control and function of *Arabidopsis* ProDH1 and ProDH2 genes on infection with biotrophic and necrotrophic pathogens. *Mol Plant Pathol.* 18(8), 1164–1174.**

Google Scholar: [Author Only Title Only Author and Title](#)

**Sarmah, B. K., Moore, A., Tate, W., Molvig, L., Morton, R. L., and Rees, D. P. (2004) Transgenic chickpea seeds expressing high levels of a bean  $\alpha$ -amylase inhibitor. *Mol. Breed.* 14, 73–82.**

Google Scholar: [Author Only Title Only Author and Title](#)

**Sharma, M. and Ghosh, R. (2016) An update on genetic resistance of chickpea to *Ascochyta* blight. *Agronomy* 6, 18**

Google Scholar: [Author Only Title Only Author and Title](#)

**Sharma, M., and Pande, S. (2013) Unravelling effects of temperature and soil moisture stress response on development of dry root rot [*Rhizoctonia bataticola* (Taub.)] Butler in Chickpea. *Am. J. Plant Sci.* 4, 584–589**

Google Scholar: [Author Only Title Only Author and Title](#)

**Sicard, A., Kappel, C., Josephs, E.B., Lee, Y.W., Marona, C., Stinchcombe J.R., Wright, S.I. and Lenhard M. (2015). Divergent sorting of a balanced ancestral polymorphism underlies the establishment of gene-flow barriers in *Capsella*. *Nat. Commun.* 6, 7960**

Google Scholar: [Author Only Title Only Author and Title](#)

**Sinha, R., Gupta, A., and Senthil-Kumar, M. (2017) Concurrent drought stress and vascular pathogen infection induce common and distinct transcriptomic responses in chickpea. *Front. Plant Sci.* 8, 333.**

Google Scholar: [Author Only Title Only Author and Title](#)

**Sinha, R., Irulappan, V., Mohan-Raju, B., Suganthi, A., and Senthil-Kumar, M. (2019) Impact of drought stress on simultaneously occurring pathogen infection in field-grown chickpea. *Scientific Rep.* 9(1), 5577.**

Google Scholar: [Author Only Title Only Author and Title](#)

**Stotz, H.U., Mitrousis, G.K., de Wit, P.J.G.M. and Fitt, B.D.L. (2014) Effector-triggered defence against apoplastic fungal pathogens. *Trends Plant Sci.* 19, 491–500**

Google Scholar: [Author Only Title Only Author and Title](#)

**Tadesse, M., Turoop, L., and Ojiewo, C.O. (2017) Survey of Chickpea (*Cicer arietinum* L) *Ascochyta* Blight (*Ascochyta rabiei* Pass.) Disease Status in Production Regions of Ethiopia. *Plant* 5(1), 23.**

Google Scholar: [Author Only Title Only Author and Title](#)

**Tarafdar, A., Rani, T.S., Chandran, U.S.S., Ghosh, R., Chobe, D.R. and Sharma, M. (2018) Exploring combined effect of abiotic (soil moisture) and biotic (*Sclerotium rolfsii* Sacc.) stress on collar rot development in chickpea. *Front. Plant Sci.* 9,1154.**

Google Scholar: [Author Only Title Only Author and Title](#)

**Tusher, V. G., Tibshirani, R., and Chu, G. (2001) Significance analysis of microarrays applied to the ionizing radiation response. *Proc. Natl. Acad. Sci. U S A*, 98(9), 5116–5121**

Google Scholar: [Author Only Title Only Author and Title](#)

**Van der Weele, C.M., Spollen, W.G., Sharp, R.E. and Baskin, T.I. (2000) Growth of *Arabidopsis thaliana* seedlings under water deficit studied by control of water potential in nutrient-agar media. *J Exp Bot.* 51, 1555–1562**

Google Scholar: [Author Only Title Only Author and Title](#)

**Verma, S., Gazara, R.K. and Verma, P.K. (2017) Transcription factor repertoire of necrotrophic fungal phytopathogen *Ascochyta rabiei*: predominance of MYB transcription factors as potential regulators of secretome. *Front. Plant Sci.* 8,1037**

Google Scholar: [Author Only Title Only Author and Title](#)

**Xia, J., Fjell, C. D., Mayer, M. L., Pena, O. M., Wishart, D. S., and Hancock, R. E. (2013). INMEX--a web-based tool for integrative meta-analysis of expression data. *Nucleic Acids Res.* 41, W63–W70.**

Google Scholar: [Author Only Title Only Author and Title](#)

**Zheng, X., Yang, L., Li, Q., Ji, L., Tang, A., Zang, L., Deng, K., Zhou, J. and Zhang, Y. (2018) MIGS as a Simple and Efficient Method for Gene Silencing in Rice. *Front. Plant Sci.* 9:662.**

Google Scholar: [Author Only Title Only Author and Title](#)

**Zhou, C.-M., Zhang, T.-Q., Wang, X., Yu, S., Lian, H., Tang, H., Feng, Z.-Y., Zozomova-Lihova, J. and Wang, J.-W. (2013) Molecular Basis of Age-Dependent Vernalization in *Cardamine flexuosa*. *Science* 340(6136), 1097-1100**

Google Scholar: [Author Only Title Only Author and Title](#)
